# Supplementary material for: Pyrolysis Kinetics of Byrsonima crassifolia Stone as Agro-Industrial Waste through Isoconversional Models
Source: MDPI journal article supplement (doi:10.3390/molecules28020544), 2023-01-05
Supplement: s1 [file s1]

## Supplementary Materials

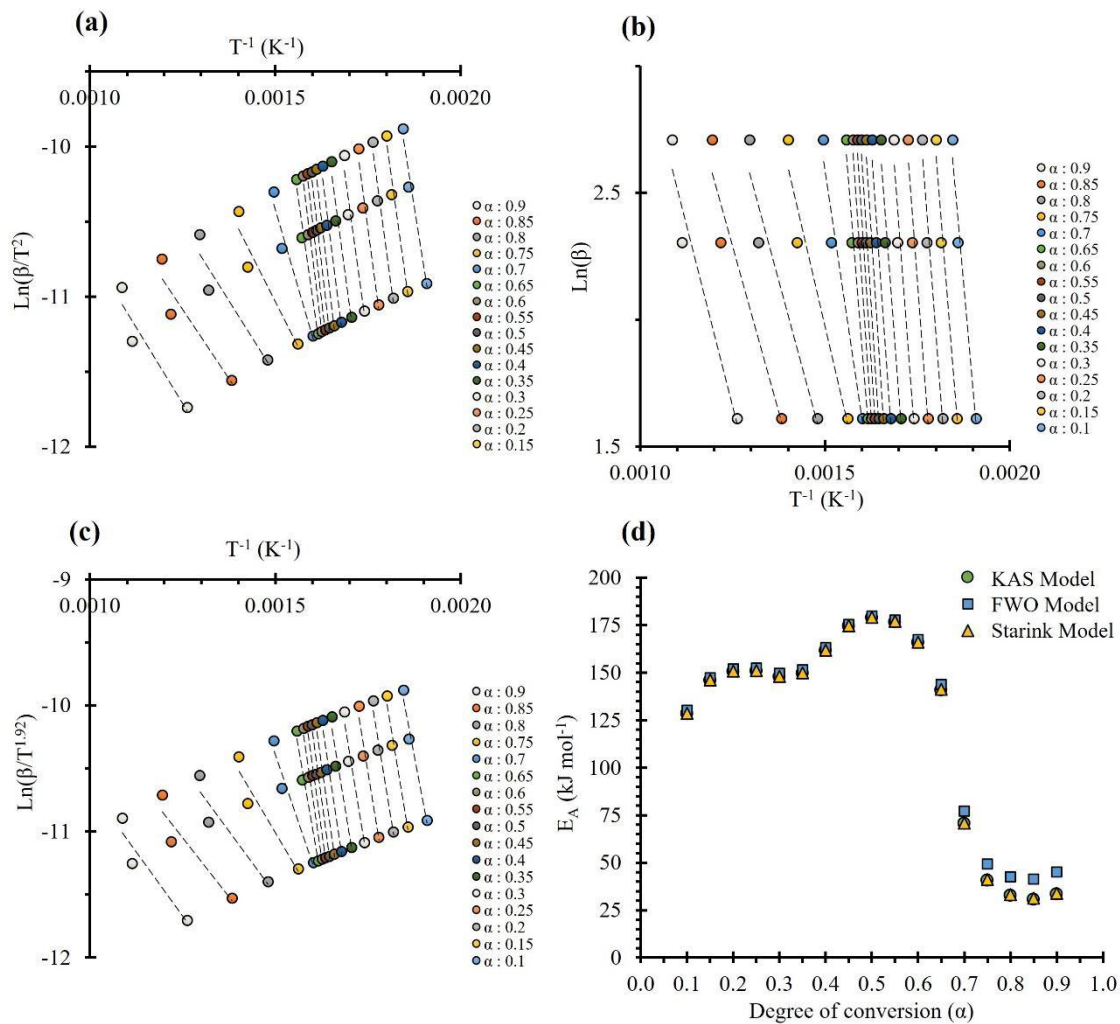

**Figure S1.** Linear plots of (a) KAS; (b) FWO model; (c) SK model; and (d)  $E_A$  depending on the degree of conversion

**Table S1.**

Expressions for  $f(\alpha)$  and  $g(\alpha)$  functions of reaction models to describe thermal decomposition solid state reactions (Sangaré et al. and Mumbach et al.) [18, 19].

| Reaction model                                 |                                     | $f(\alpha)$                                        | $g(\alpha)$                            |
|------------------------------------------------|-------------------------------------|----------------------------------------------------|----------------------------------------|
| Reaction order models                          |                                     |                                                    |                                        |
| R1                                             | Mampel (first order)                | $1 - \alpha$                                       | $-\ln(1 - \alpha)$                     |
| R2                                             | Second order                        | $(1 - \alpha)^2$                                   | $(1 - \alpha)^{-1} - 1$                |
| R3                                             | Third order                         | $(1 - \alpha)^3$                                   | $0.5[(1 - \alpha)^{-2} - 1]$           |
| R4                                             | One and half order                  | $(1 - \alpha)^{3/2}$                               | $[(1 - \alpha)^{-1/2} - 1]$            |
| Rn                                             | n-order reaction                    | $(1 - \alpha)^n$                                   | $[1 - (1 - \alpha)^{1-n}]/(1-n)$       |
| Diffusion models                               |                                     |                                                    |                                        |
| D1                                             | One dimensional                     | $0.5 \alpha^{-1}$                                  | $\alpha^2$                             |
| D2                                             | Two dimensional (Valensi model)     | $[-\ln(1 - \alpha)]^{-1}$                          | $(1 - \alpha)\ln(1 - \alpha) + \alpha$ |
| D3                                             | Diffusion control (Jander control)  | $(1 - \alpha)^{2/3} [1 - (1 - \alpha)^{1/3}]^{-1}$ | $[1 - (1 - \alpha)^{1/3}]^2$           |
| D4                                             | Diffusion control (Ginstling model) | $(3/2) [(1 - \alpha)^{-1/3} - 1]^{-1}$             | $1 - (2/3)\alpha - (1 - \alpha)^{2/3}$ |
| Power law nucleation models                    |                                     |                                                    |                                        |
| P1                                             | Power law                           | $(2/3)\alpha^{-1/2}$                               | $\alpha^{3/2}$                         |
| P2                                             | Power law                           | $2\alpha^{1/2}$                                    | $\alpha^{1/2}$                         |
| P3                                             | Power law                           | $3\alpha^{2/3}$                                    | $\alpha^{1/3}$                         |
| P4                                             | Power law                           | $4\alpha^{3/4}$                                    | $\alpha^{1/4}$                         |
| Random nucleation and subsequent growth models |                                     |                                                    |                                        |
| A1                                             | Avrami-Erofeev                      | $1.5(1 - \alpha)[- \ln(1 - \alpha)]^{1/3}$         | $[- \ln(1 - \alpha)]^{2/3}$            |
| A2                                             | Avrami-Erofeev                      | $2(1 - \alpha)[- \ln(1 - \alpha)]^{1/2}$           | $[- \ln(1 - \alpha)]^{1/2}$            |
| A3                                             | Avrami-Erofeev                      | $3(1 - \alpha)[- \ln(1 - \alpha)]^{2/3}$           | $[- \ln(1 - \alpha)]^{1/3}$            |
| A4                                             | Avrami-Erofeev                      | $4(1 - \alpha)[- \ln(1 - \alpha)]^{3/4}$           | $[- \ln(1 - \alpha)]^{1/4}$            |
| A5                                             | Random nucleation                   | $(1 - \alpha)^2$                                   | $(1 - \alpha)^{-1}$                    |
| A6                                             | Random nucleation                   | $0.5(1 - \alpha)^3$                                | $(1 - \alpha)^{-2}$                    |
| Geometrical contraction models                 |                                     |                                                    |                                        |
| F2                                             | Contracting cylinder                | $2(1 - \alpha)^{1/3}$                              | $1 - (1 - \alpha)^{1/2}$               |
| F3                                             | Contracting sphere                  | $2(1 - \alpha)^{2/3}$                              | $1 - (1 - \alpha)^{1/3}$               |

**Table S2.**Apparent activation energy ( $E_A$ ) of pyrolysis of BCS determined by isoconversional methods.

| $\alpha$ | KAS            |       | FWO            |       | SK             |       |
|----------|----------------|-------|----------------|-------|----------------|-------|
|          | $E_A$ (kJ/mol) | $R^2$ | $E_A$ (kJ/mol) | $R^2$ | $E_A$ (kJ/mol) | $R^2$ |
| 0.10     | 128.3          | 0.98  | 130.4          | 0.98  | 128.6          | 0.98  |
| 0.15     | 145.8          | 0.98  | 147.3          | 0.98  | 146.1          | 0.98  |
| 0.20     | 150.6          | 0.97  | 151.9          | 0.97  | 150.8          | 0.97  |
| 0.25     | 150.8          | 0.96  | 152.4          | 0.97  | 151.1          | 0.96  |
| 0.30     | 147.9          | 0.96  | 149.8          | 0.96  | 148.1          | 0.96  |
| 0.35     | 149.6          | 0.96  | 151.6          | 0.96  | 149.9          | 0.96  |
| 0.40     | 161.7          | 0.97  | 163.2          | 0.97  | 161.9          | 0.97  |
| 0.45     | 174.4          | 0.98  | 175.4          | 0.98  | 174.6          | 0.98  |
| 0.50     | 178.9          | 0.98  | 179.8          | 0.99  | 179.2          | 0.98  |
| 0.55     | 176.7          | 0.99  | 177.8          | 0.99  | 177.0          | 0.99  |
| 0.60     | 165.9          | 0.99  | 167.5          | 0.99  | 166.1          | 0.99  |
| 0.65     | 140.9          | 0.98  | 143.9          | 0.98  | 141.2          | 0.98  |
| 0.70     | 70.6           | 0.96  | 77.3           | 0.97  | 70.9           | 0.96  |
| 0.75     | 40.8           | 0.92  | 49.4           | 0.95  | 41.2           | 0.92  |
| 0.80     | 32.8           | 0.89  | 42.6           | 0.94  | 33.3           | 0.89  |
| 0.85     | 30.7           | 0.88  | 41.5           | 0.94  | 31.2           | 0.88  |
| 0.90     | 33.4           | 0.90  | 45.2           | 0.95  | 34.0           | 0.90  |
| Average  | 122.3          | 0.95  | 126.3          | 0.97  | 122.7          | 0.96  |
